# Supplementary material for: Structure of human TRPV4 in complex with GTPase RhoA
Source: Springer Nature journal article supplement (doi:10.1038/s41467-023-39346-z), 2023-06-23
Supplement: MOESM1 [file 41467_2023_39346_MOESM1_ESM.pdf]

# Supplementary Information

## Structure of human TRPV4 in complex with GTPase RhoA

Kirill D. Nadezhdin<sup>1,5</sup>, Irina A. Talyzina<sup>1,2,5</sup>, Aravind Parthasarathy<sup>3</sup>, Arthur Neuberger<sup>1</sup>, David X. Zhang<sup>3,4</sup>, Alexander I. Sobolevsky<sup>1,\*</sup>

<sup>1</sup> Department of Biochemistry and Molecular Biophysics, Columbia University, New York, NY 10032, USA

<sup>2</sup> Integrated Program in Cellular, Molecular and Biomedical Studies, Columbia University, New York, NY 10032, USA

<sup>3</sup> Department of Medicine, Cardiovascular Center, Medical College of Wisconsin, Milwaukee, WI 53226, USA

<sup>4</sup> Department of Pharmacology and Toxicology, Medical College of Wisconsin, Milwaukee, WI 53226, USA

<sup>5</sup> These authors contributed equally.

\*Corresponding author. E-mail: [as4005@cumc.columbia.edu](mailto:as4005@cumc.columbia.edu)

### **This PDF file includes:**

Supplementary Figures 1-10

Supplementary Table 1

Supplementary References

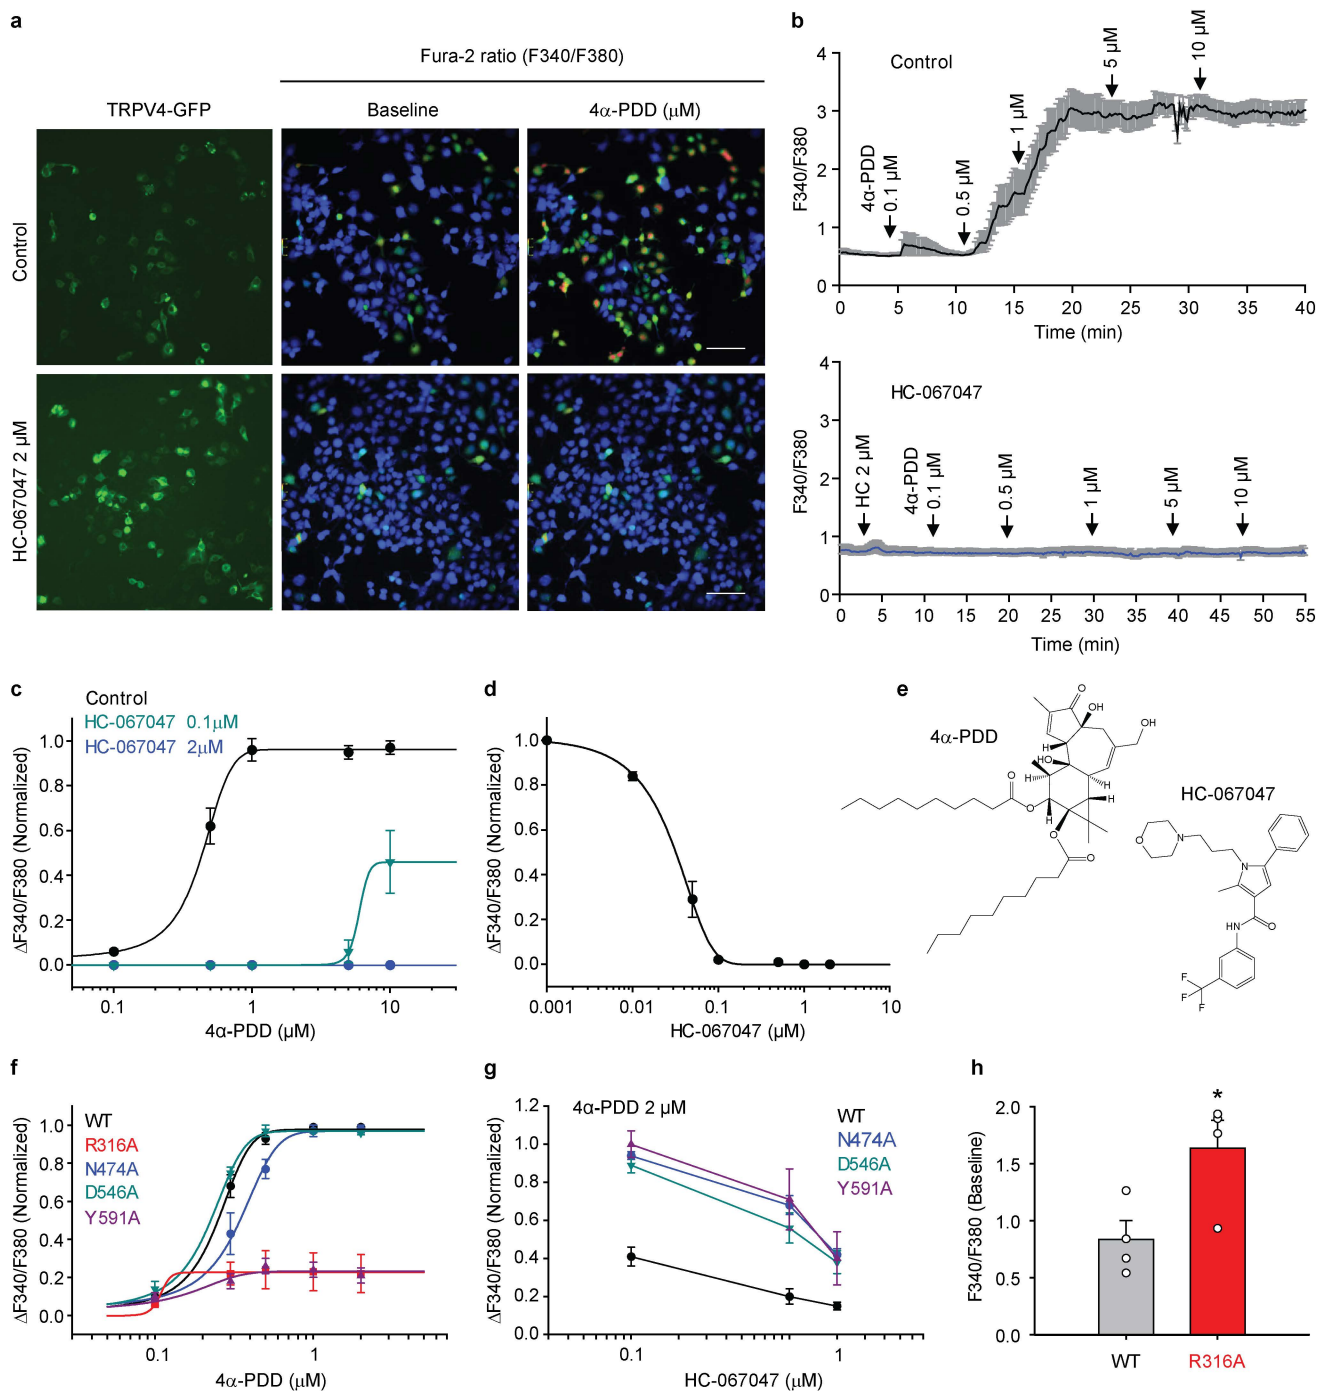

### Supplementary Figure 1 | Functional characterization of wild type and mutant hTRPV4. **a**

Representative GFP (left) and fura-2 (right 2 panels) fluorescence images of HEK293 cells transfected with wild-type TRPV4-GFP (C-terminal GFP fusion protein) before (baseline) and after addition of TRPV4 agonist 4 $\alpha$ -PDD (10  $\mu$ M), in the absence or presence of pretreatment with TRPV4 antagonist HC-067047 (2  $\mu$ M), respectively. The intracellular Ca<sup>2+</sup> concentrations were monitored by the ratiometric calcium indicator fura-2 and the results are presented as F340/F380 ratios, with the corresponding fluorescence pseudo-colored from blue to red on the scale of 0.0-5.0. Scale bar = 100  $\mu$ m. The experiment was repeated four times. **b** Representative traces. The black or blue line denotes mean F340/F380 ratio of individual cells recorded in one assay and the gray area 1xSEM. 4 $\alpha$ -PDD (0.1  $\mu$ M – 10  $\mu$ M) induced Ca<sup>2+</sup> increase in a concentration-dependent manner, and this increase was largely inhibited by TRPV4-selective antagonist

HC-067047 (2  $\mu$ M). **c** Dose-response curves for 4 $\alpha$ -PDD in the absence or presence of HC-067047. The responses were normalized to the estimated maximal F340/F380 ratios in response to saturating concentrations of 4 $\alpha$ -PDD. Curve fitting was performed using the ligand binding sigmoidal dose-response function (SigmaPlot version 12.5). The value of the half-maximal effective concentration for activation of hTRPV4 by 4 $\alpha$ -PDD in the absence of HC-067047,  $EC_{50} = 450 \pm 39$  nM ( $n = 4$ ), and  $> 2$   $\mu$ M ( $n = 4$ ) after treatment with 2  $\mu$ M HC-067047. **d** Dose-response curve for inhibition of hTRPV4 by HC-067047 in HEK293 cells stimulated with 4 $\alpha$ -PDD (1  $\mu$ M), with the half-maximal inhibitory concentration ( $IC_{50}$ ) of  $25 \pm 6.2$  nM ( $n = 4$ ). **e** Chemical formulas for the TRPV4 agonist 4 $\alpha$ -PDD and antagonist HC-067047. **f** Dose-response curves for 4 $\alpha$ -PDD in wild-type and mutant TRPV4 channels ( $n = 4$ ). **g** Dose-response curves for HC-067047 inhibition of 4 $\alpha$ -PDD (2  $\mu$ M)-induced activation of wild-type and mutant TRPV4 channels ( $n = 4$ ). **h** Baseline F340/F380 ratios in wild-type and R316A mutant TRPV4 channels ( $n = 4$ ). For comparison of baseline F340/F380 ratios, all cells expressing wild-type or mutant TRPV4-GFP channels were included in the analysis. Statistical analysis: two-sided t-test, \*  $P < 0.05$ . Source data for panels **c**, **d**, **f**, **g**, and **h** are provided as a Source Data file. Data are presented as mean values  $\pm$  SEM.

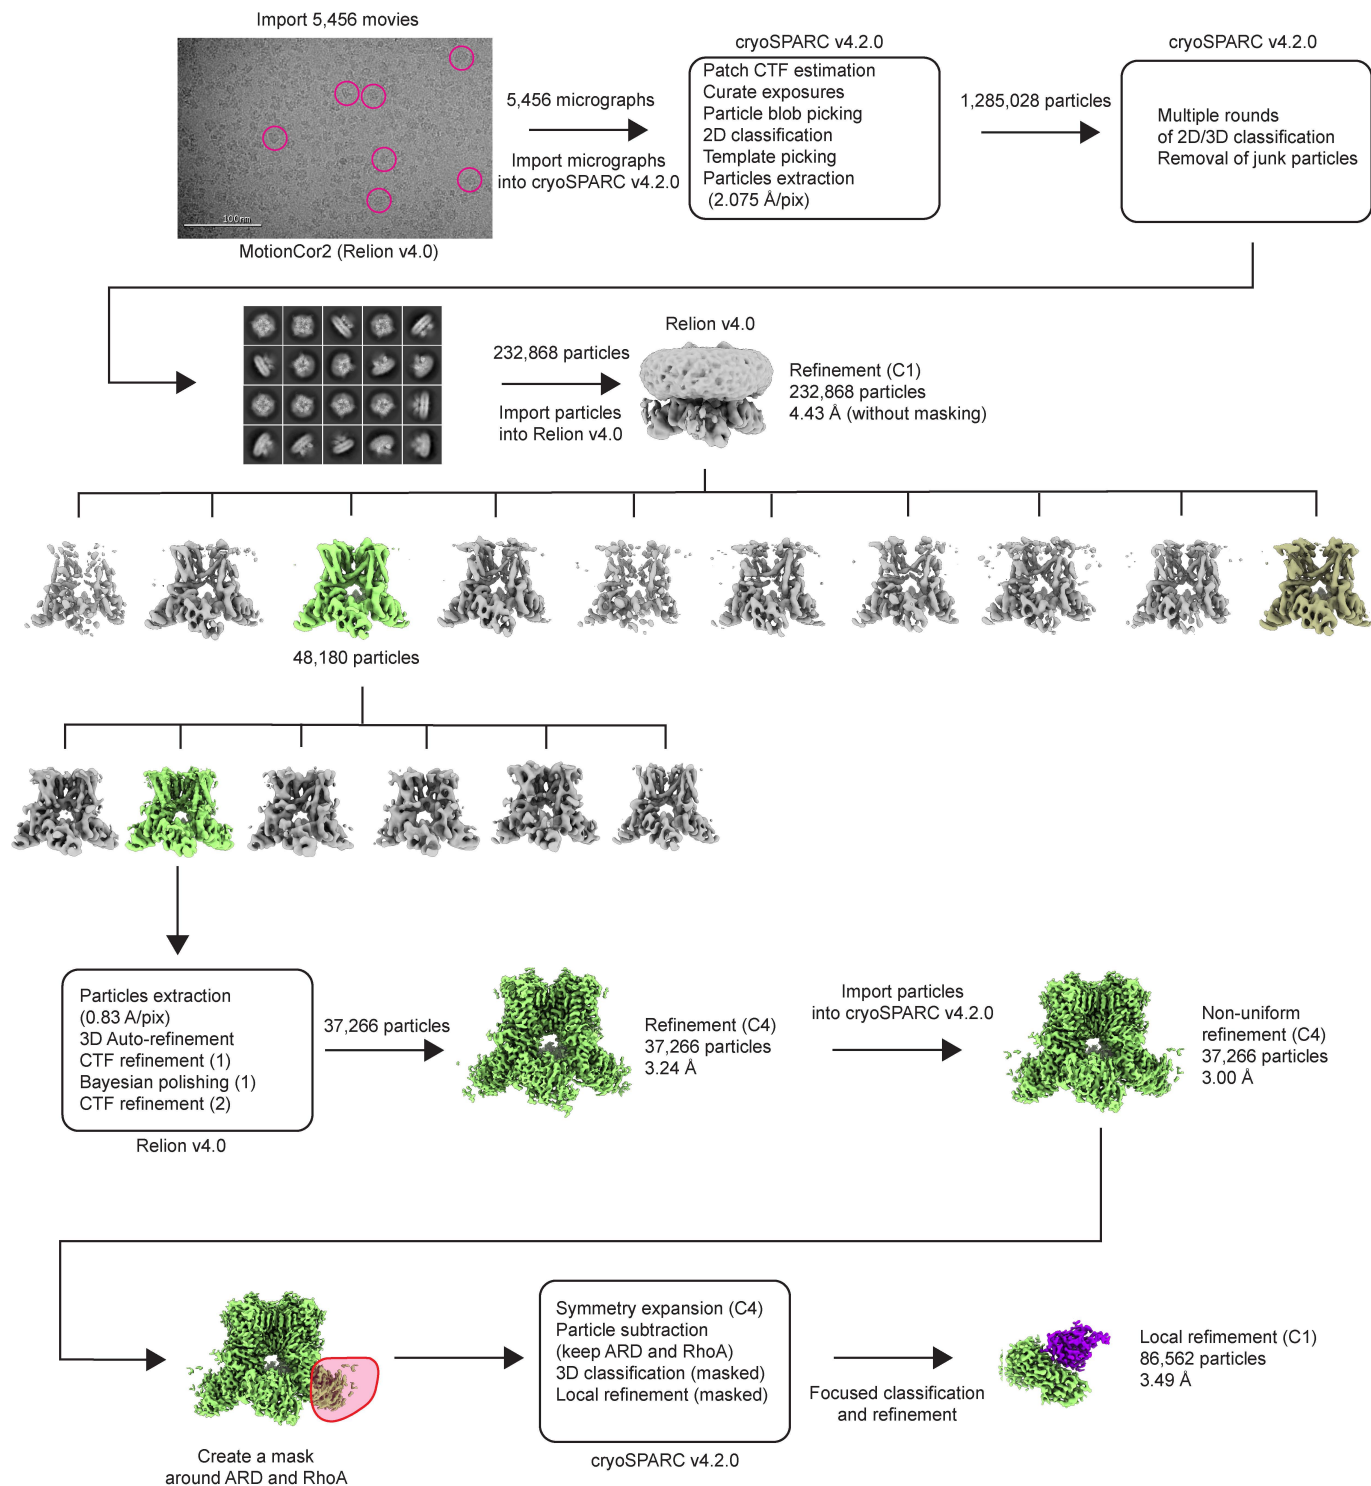

**Supplementary Figure 2 | Overview of cryo-EM data collected for hTRPV4<sub>apo</sub> and 3D reconstruction workflow.** In the representative micrograph, example particles are circled in pink.



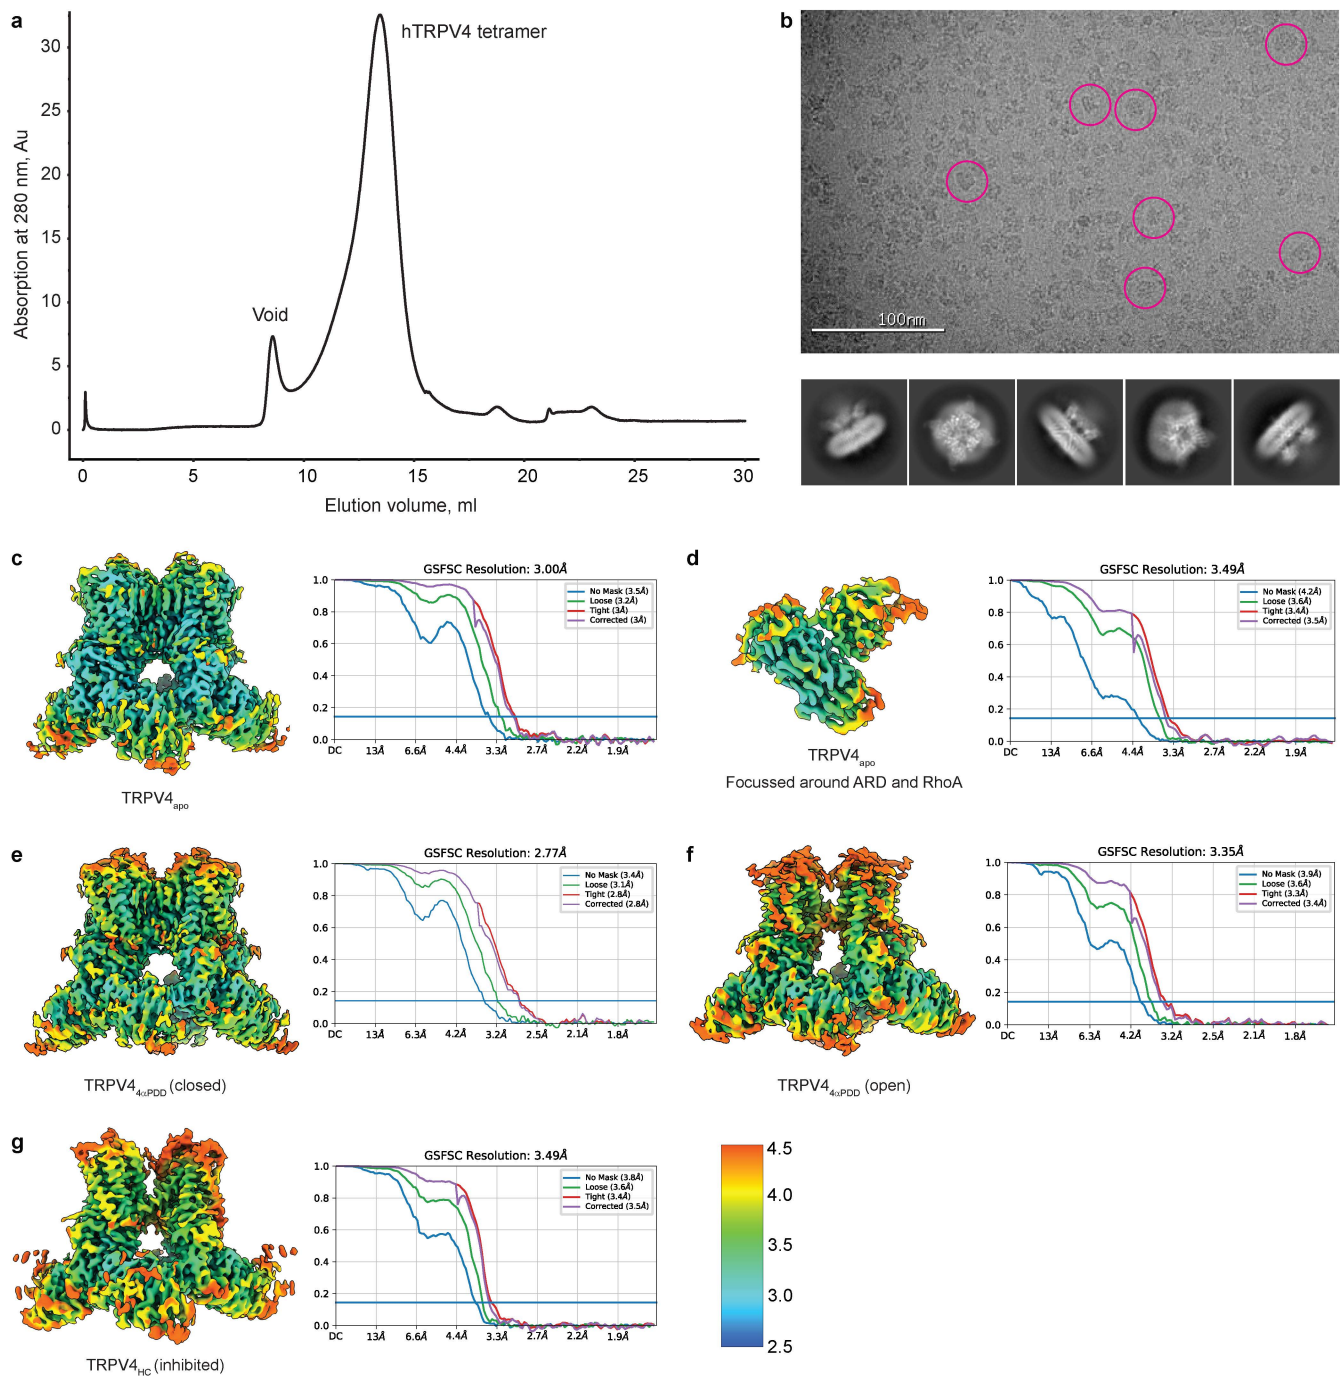

**Supplementary Figure 3. Characteristics of Cryo-EM reconstructions** | **a** SEC profile for TRPV4 in GDN. **b** Exemplar micrograph and reference-free 2D-classification averages from TRPV4<sub>apo</sub> structure collection with individual particles circled in red. A total number of 5,456, 15,624, and 11,551 of such micrographs were collected in the apo condition, in the presence of 4α-PDD and in the presence of HC-067047, respectively. **c-g** Cryo-EM maps are colored according to the local resolution estimation in cryoSPARC with FSC = 0.5 criterion. Plots show FSC curves calculated between half maps, with the overall resolution estimated using the FSC = 0.143 criterion.

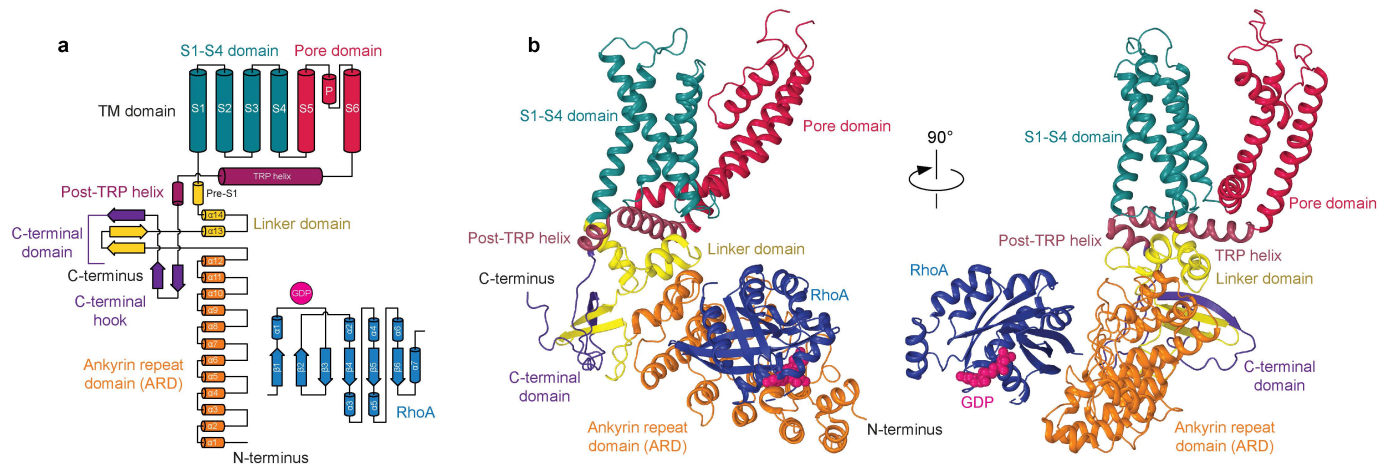

**Supplementary Figure 4 | Overall architecture of the hTRPV4 subunit and RhoA. a** hTRPV4 subunit topology diagram colored according to domain organization. **b** Cartoon representation of hTRPV4 subunit colored according to domain organization.

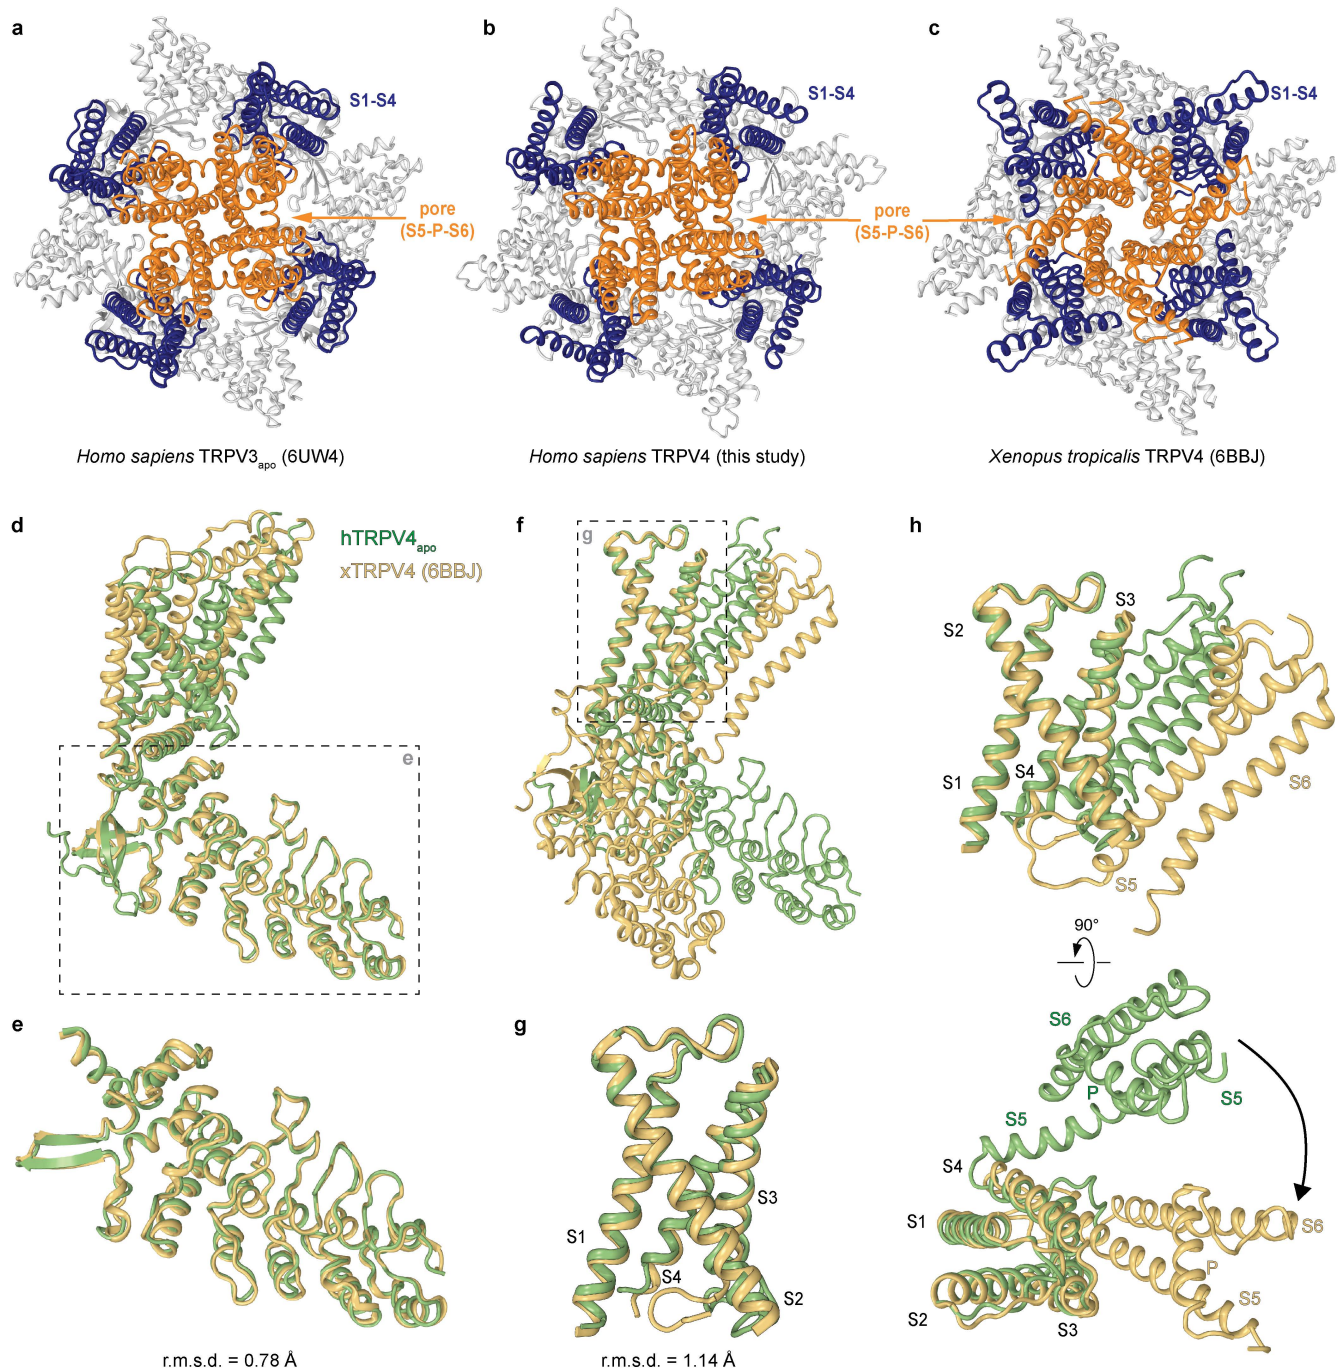

**Supplementary Figure 5 | Structural comparisons of human TRPV4 with human TRPV3 and frog TRPV4.** **a-c** Extracellular views of hTRPV3 (**a**, PDB ID: 6UW4)<sup>1</sup>, hTRPV4<sub>apo</sub> (**b**, this study), and *Xenopus tropicalis* TRPV4 (**c**, PDB ID: 6BBJ)<sup>2</sup> aligned based on the ARDs. The colored grey, S1-S4 domains blue, and pore domains comprising S5-P-S6 – orange. **d** ARD-based superposition of single subunits from hTRPV4<sub>apo</sub> (green) and xTRPV4 (beige). **e** Close-up view of the ARDs from (d). **f** S1-S4 domain-based superposition of single subunits from hTRPV4<sub>apo</sub> and xTRPV4. **g** Close-up view of the S1-S4 domains from (f). **h** Close-up view of the entire TMDs from (f). Arrows show relative displacements of the pore domain relative to the S1-S4 domain. Note, while the overall architecture of hTRPV3, hTRPV4, and xTRPV4 (**a-c**) and individual domain structures (**e,g**) appear to be similar, there is a dramatic relative rearrangement of domains in hTRPV4 and xTRPV4 exemplified by the particularly striking displacement of the pore versus S1-S4 domains (**h**).



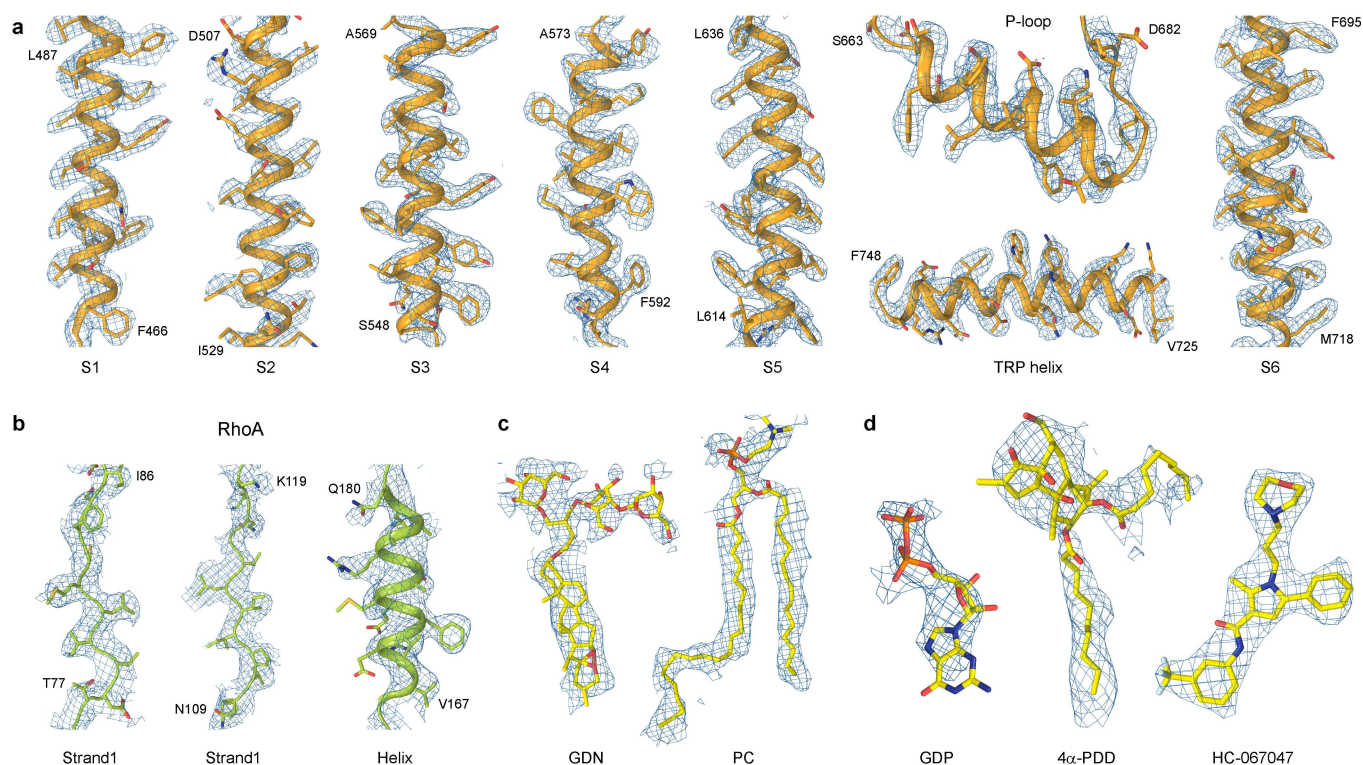

**Supplementary Figure 6 | Cryo-EM density of hTRPV4 and RhoA.** **a** Fragments of the hTRPV4<sub>apo</sub> TMD with the structural model shown as orange ribbon and sticks and the corresponding cryo-EM density as a blue mesh. **b** Fragments of the RhoA structural model shown as green ribbon and sticks and the corresponding cryo-EM density as a blue mesh. **c** Representative densities (blue mesh) for the detergent glyco-diosgenin (GDN) and lipid phosphatidylcholine (PC) shown in sticks (yellow). **d** Representative densities (blue mesh) for the hTRPV4-RhoA ligands guanosine diphosphate (GDP), 4 $\alpha$ -PDD, and HC-067047 shown in sticks.

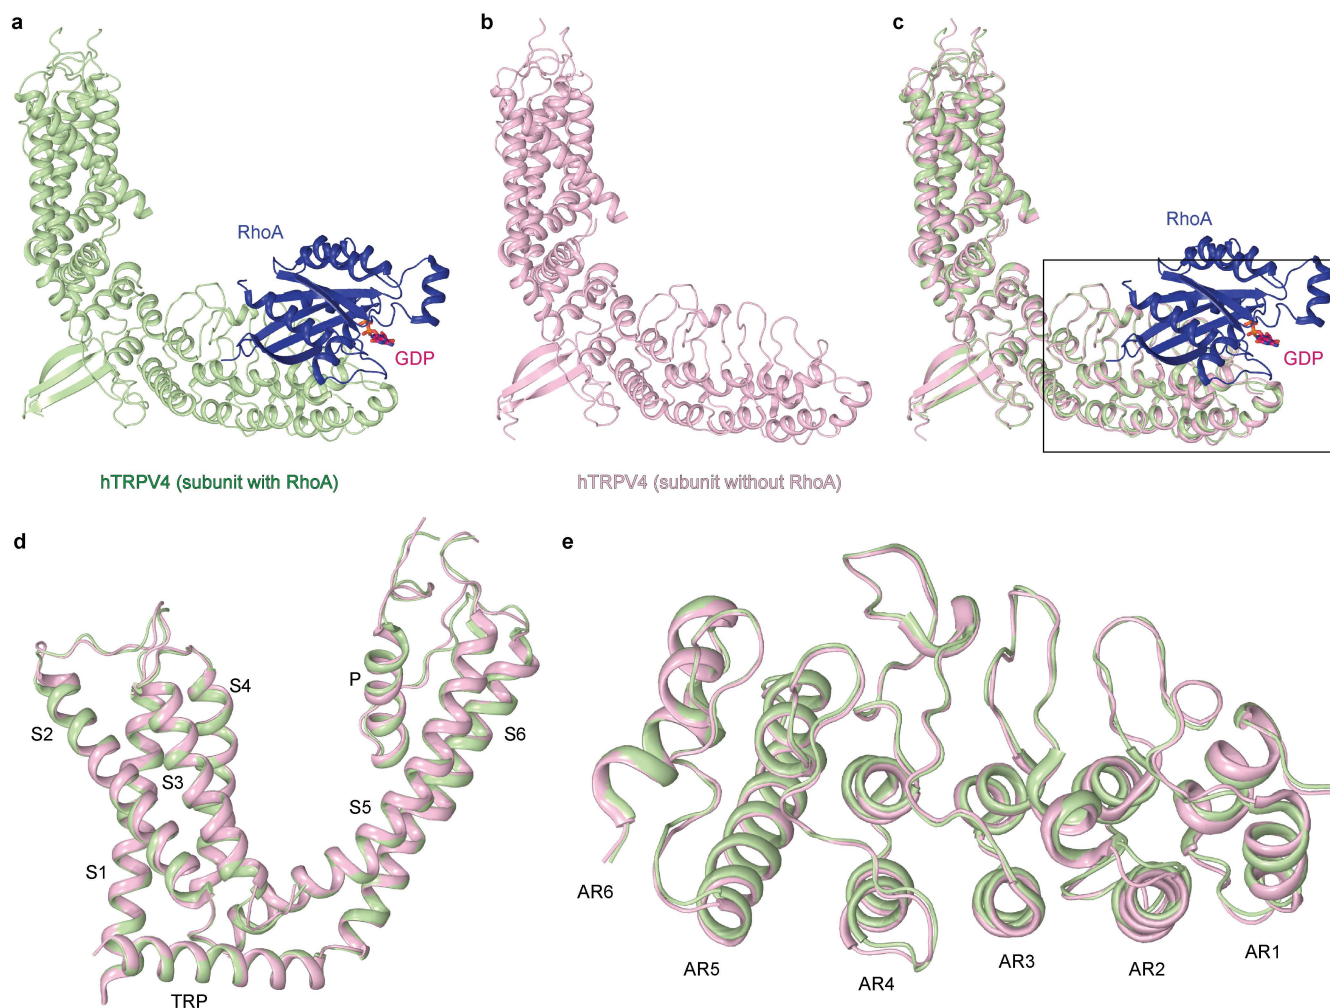

**Supplementary Figure 7 | Comparison of hTRPV4 subunits with and without bound RhoA. a-c** Single hTRPV4 subunit with (a) and without bound RhoA (b) and their superposition (c). **d-e** Close-up view of the TMD (d) and ARD (e) from superposition in (c).

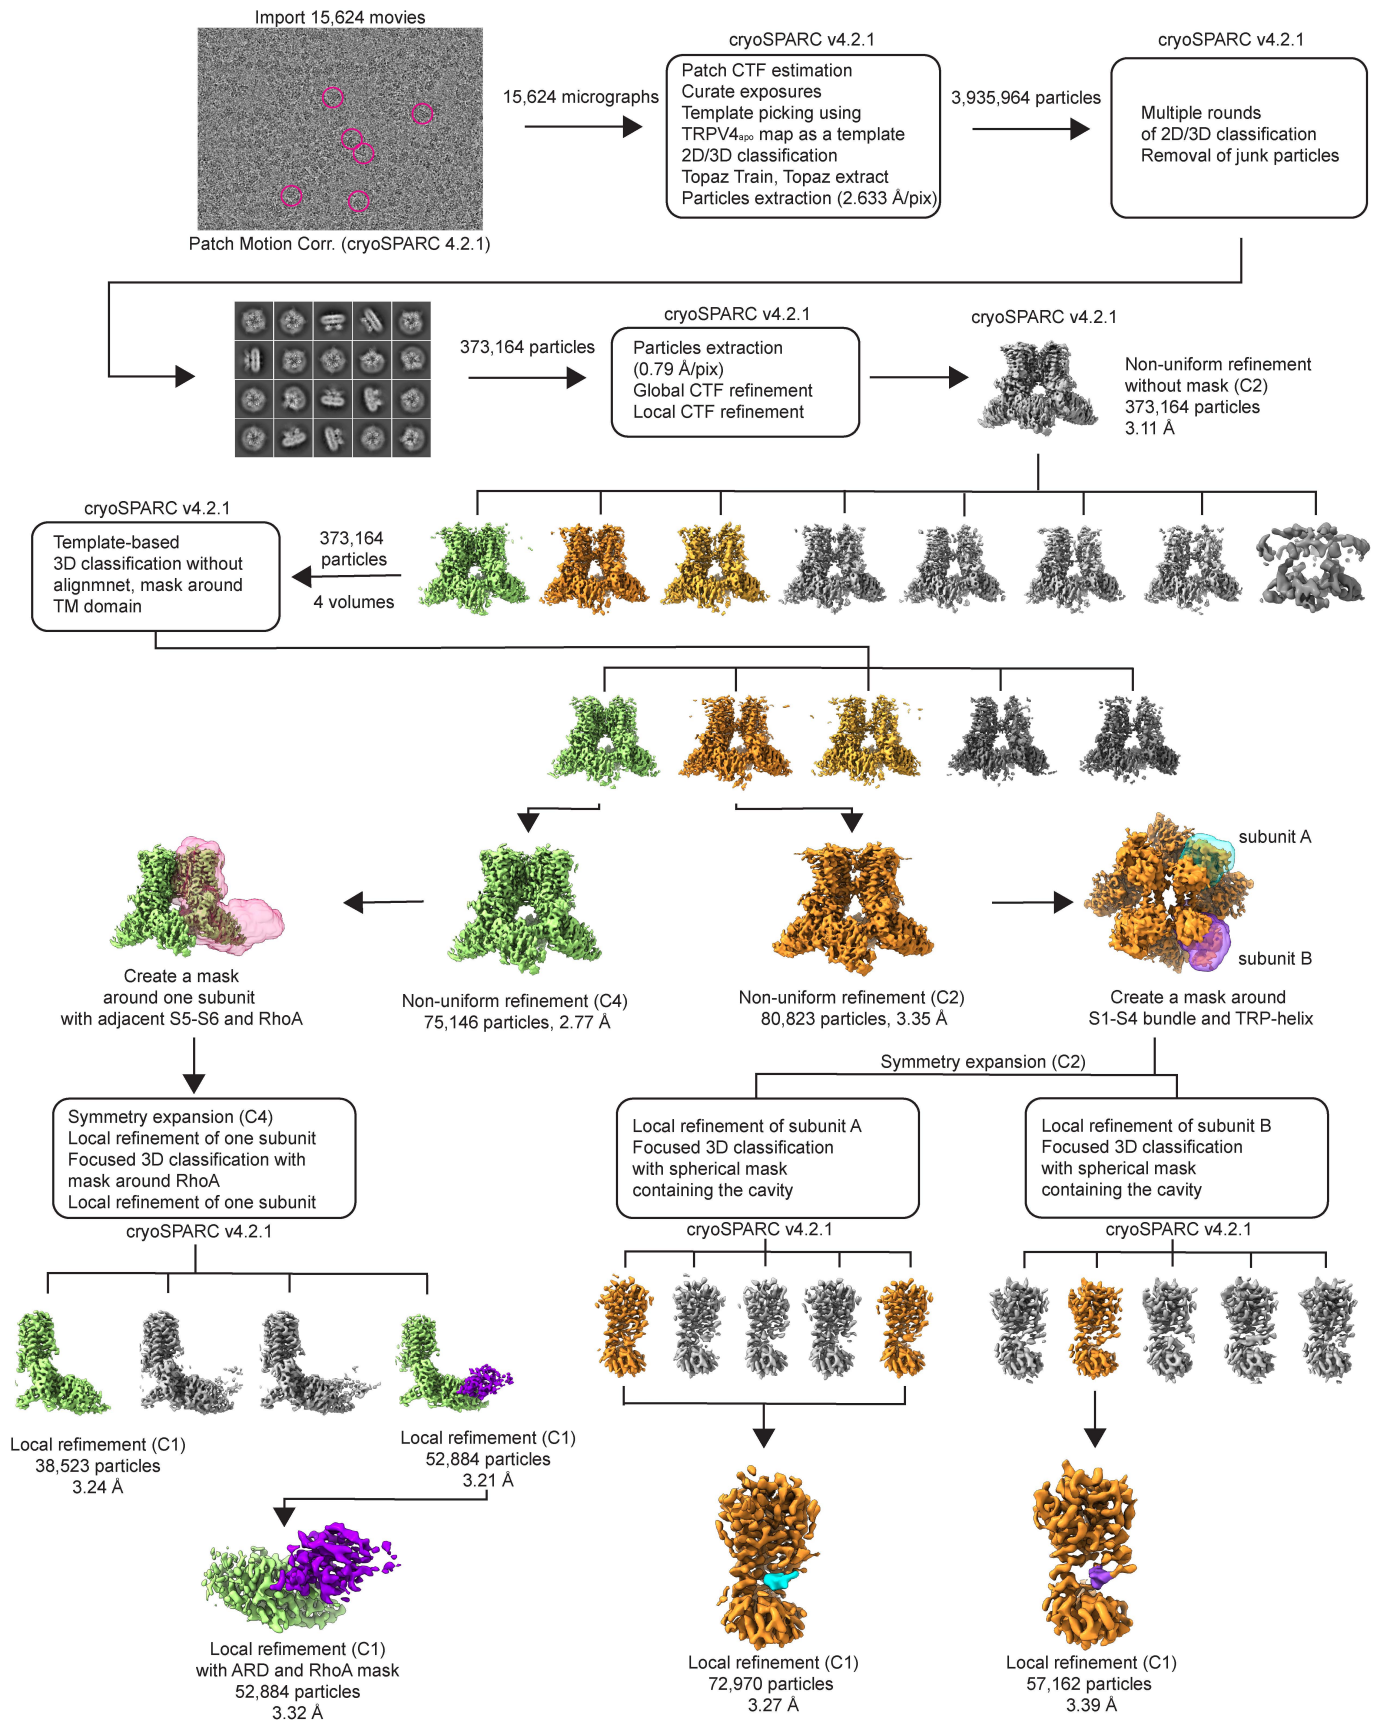

**Supplementary Figure 8 | Overview of cryo-EM data collected for hTRPV4<sub>4α</sub>-PDD and 3D reconstruction workflow.** In the representative micrograph, example particles are circled in pink.



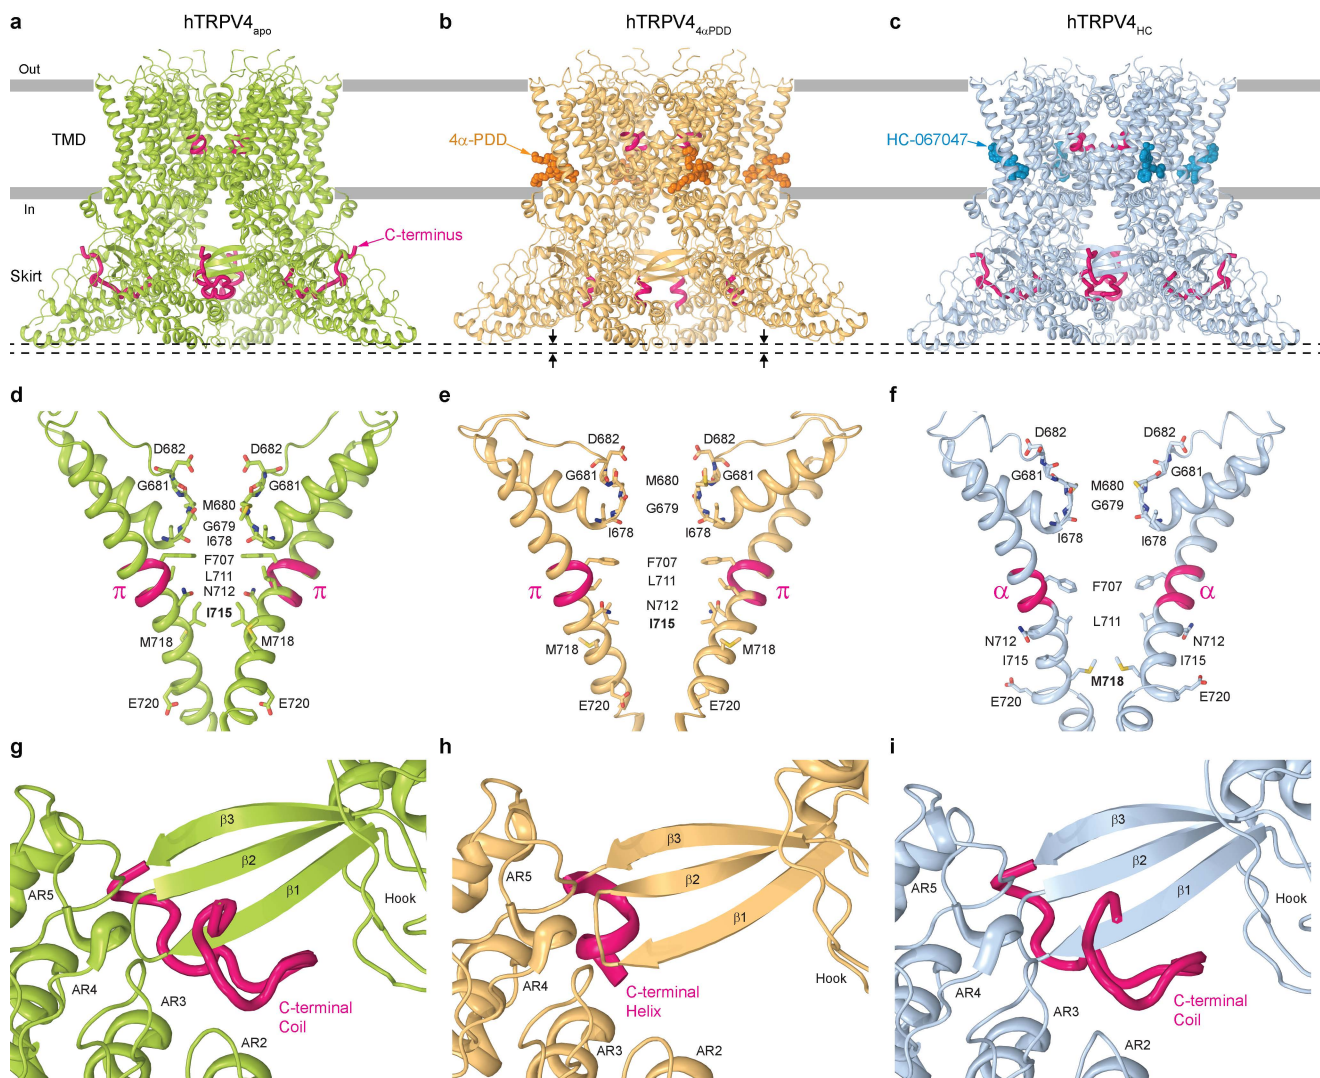

**Supplementary Fig. 9 | Comparison of the hTRPV4<sub>apo</sub>, hTRPV4<sub>4αPDD</sub> and hTRPV4<sub>HC</sub> structures. a-c** hTRPV4<sub>apo</sub> (a), hTRPV4<sub>4αPDD</sub> (b) and hTRPV4<sub>HC</sub> (c) structures viewed parallel to the membrane, with the C-termini and regions of S6 undergoing the α-to-π transition colored pink. Molecules of 4α-PDD (b) and HC-067047 (c) are shown as space-filling models. Movement of the skirt towards the membrane in hTRPV4<sub>4αPDD</sub> (b) is indicated. **d-f** Pore-forming domains in hTRPV4<sub>apo</sub> (d), hTRPV4<sub>4αPDD</sub> (e) and hTRPV4<sub>HC</sub> (f) with the residues contributing to pore lining shown as sticks. Only two (A and C) of four subunits are shown, with the front and back subunits omitted for clarity. The region that undergoes the α-to-π transition in S6 (pink) is labeled. **g-i** Interface between the neighboring subunits in hTRPV4<sub>apo</sub> (g), hTRPV4<sub>4αPDD</sub> (h) and hTRPV4<sub>HC</sub> (i) with the C-terminus (pink) adapting coiled (g, i) or helical (h) conformations.



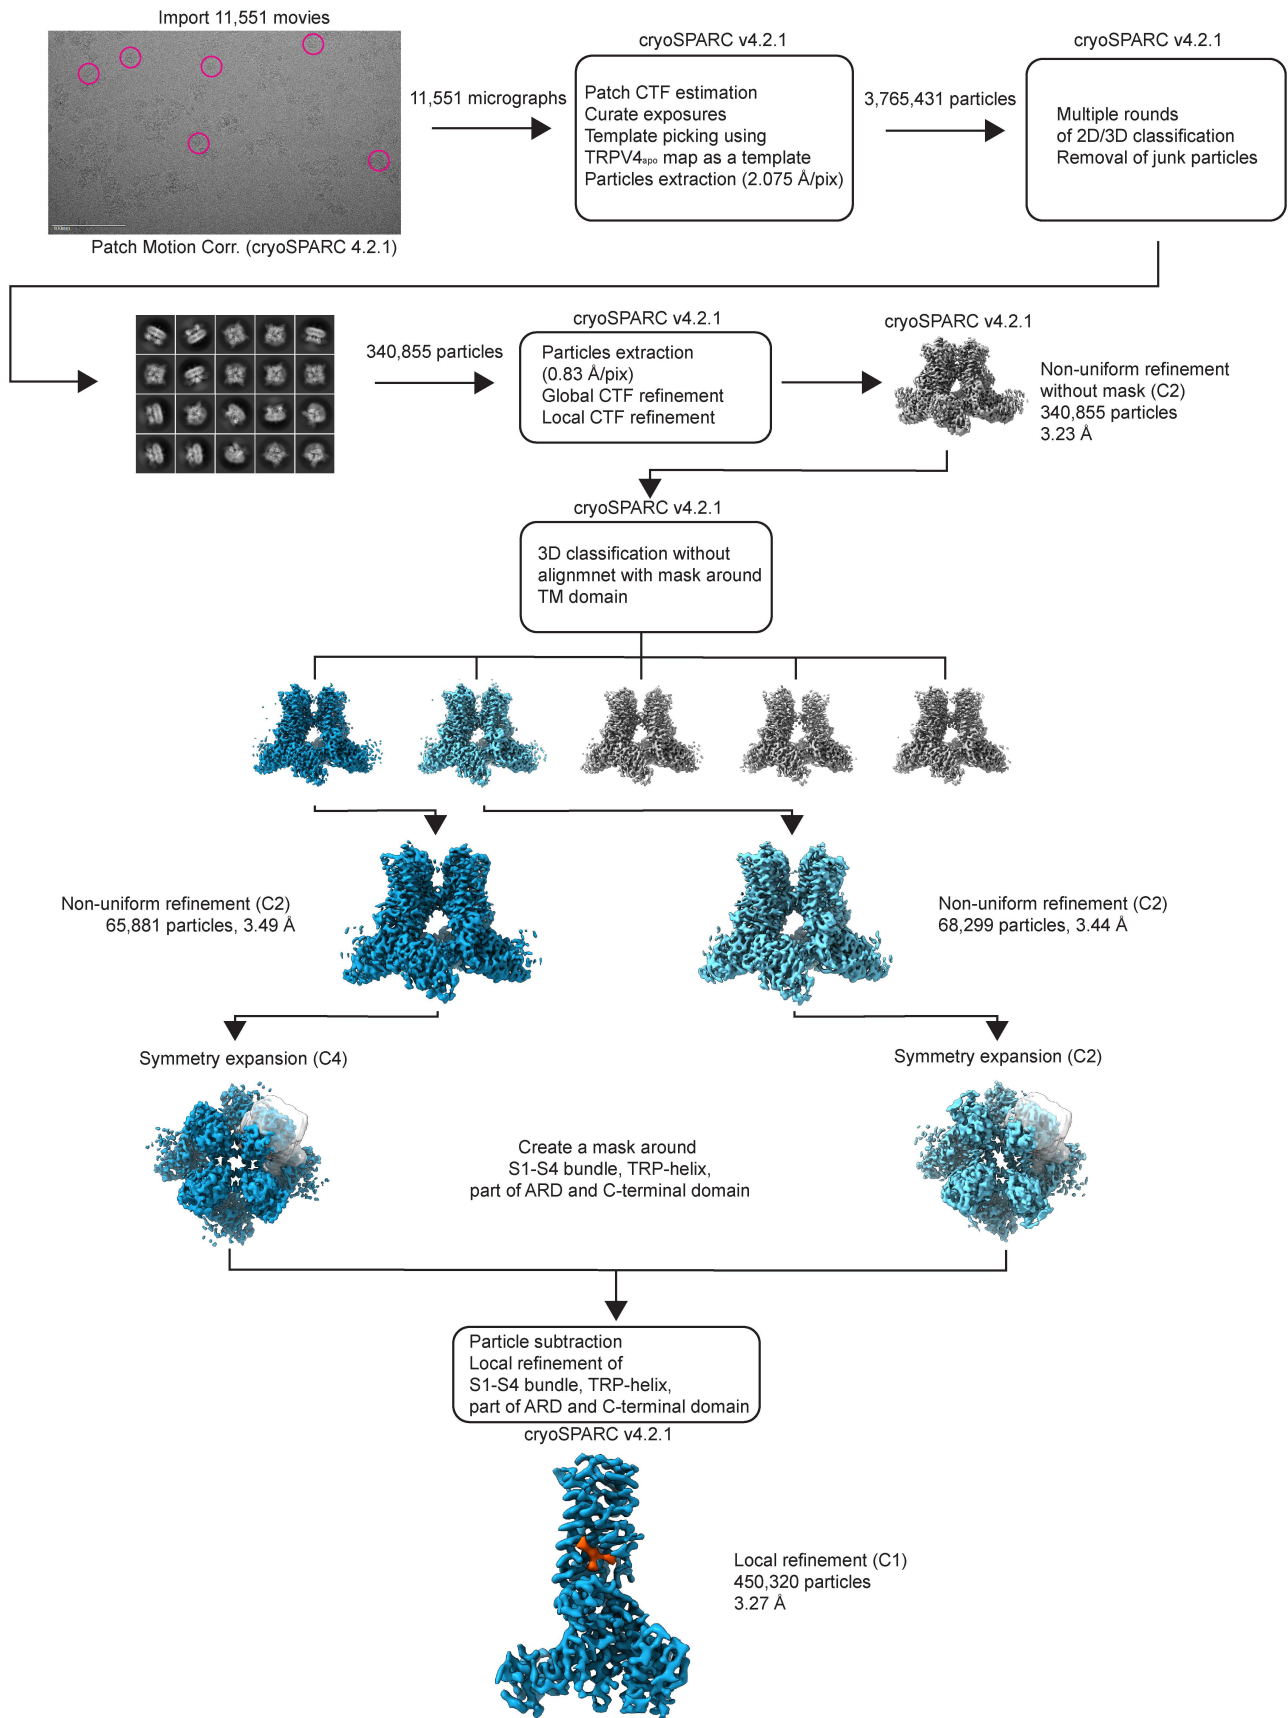

**Supplementary Figure 10 | Overview of cryo-EM data collected for hTRPV4<sub>HC</sub> and 3D reconstruction workflow.** In the representative micrograph, example particles are circled in pink.

**Supplementary Table 1 | Cryo-EM data collection, refinement, and validation statistics.**

| Structure                                           | TRPV4 <sub>apo</sub>        | ARD-RhoA                    | hTRPV4 <sub>4αPDD</sub> | hTRPV4 <sub>4αPDD</sub> | TRPV4 <sub>HC</sub> |
|-----------------------------------------------------|-----------------------------|-----------------------------|-------------------------|-------------------------|---------------------|
| State                                               | Closed                      |                             | Open                    | Closed                  | Inhibited           |
| Condition/Ligand                                    | Apo                         | Focused                     | 4α-PDD                  | 4α-PDD                  | HC-067047           |
| EMDB accession code                                 | EMDB-40958                  | EMDB-40959                  | EMDB-40960              | EMDB-40961              | EMDB-40962          |
| PDB accession code                                  | 8T1B                        | 8T1C                        | 8T1D                    | 8T1E                    | 8T1F                |
| <b>Data collection and processing</b>               |                             |                             |                         |                         |                     |
| Magnification                                       | 105,000x                    | 105,000x                    | 29,000x                 | 29,000x                 | 105,000x            |
| Voltage (kV)                                        | 300                         | 300                         | 300                     | 300                     | 300                 |
| Electron exposure (e <sup>-</sup> /Å <sup>2</sup> ) | 58                          | 58                          | 60                      | 60                      | 58                  |
| Defocus range (μm)                                  | -0.5 to -1.5                | -0.5 to -1.5                | -0.75 to -1.5           | -0.75 to -1.5           | -0.5 to -1.5        |
| Reported pixel size (Å)                             | 0.83                        | 0.83                        | 0.7888                  | 0.7888                  | 0.83                |
| Calibrated pixel size (Å)                           | 0.83                        | 0.83                        | 0.7888                  | 0.7888                  | 0.83                |
| Exposures (no.)                                     | 5,456                       | 5,456                       | 15,624                  | 15,624                  | 11,551              |
| <b>Processing software</b>                          |                             |                             |                         |                         |                     |
| Platform software for particle picking              | CryoSPARC 4.2.0             | CryoSPARC 4.2.0             | CryoSPARC 4.2.1         | CryoSPARC 4.2.1         | CryoSPARC 4.2.1     |
| Motion correction                                   | MotionCor2                  | MotionCor2                  | Patch Motion            | CryoSPARC               | CryoSPARC           |
| CTF estimation                                      | Patch CTF                   | Patch CTF                   | Patch CTF               | Patch CTF               | Patch CTF           |
| Software for 2D/3D class. & refinements             | Relion 4.0, CryoSPARC 4.2.0 | Relion 4.0, CryoSPARC 4.2.0 | CryoSPARC 4.2.1         | CryoSPARC 4.2.1         | CryoSPARC 4.2.1     |
| Symmetry imposed                                    | C4                          | C1                          | C2                      | C4                      | C2                  |
| Initial particle images (no.)                       | 1,285,028                   | 1,285,028                   | 3,935,964               | 3,935,964               | 3,267,981           |
| Final particle images (no.)                         | 37,266                      | 86,562                      | 80,823                  | 75,146                  | 65,881              |
| Map resolution (Å)                                  | 3.00                        | 3.49                        | 3.35                    | 2.77                    | 3.49                |
| FSC 0.143                                           |                             |                             |                         |                         |                     |
| Map resolution range, min/median/max (Å)            | 2.68/6.00/45.50             | 1.76/5.57/55.32             | 2.94/6.98/46.81         | 1.67/7.01/43.18         | 3.01/6.94/37.71     |
| <b>Refinement</b>                                   |                             |                             |                         |                         |                     |
| Initial models used (PDB code)                      | 7AA5                        | 1FTN                        | This study              | This study              | This study          |
| Model resolution (Å)                                | 3.00                        | 3.49                        | 3.35                    | 2.77                    | 3.49                |
| FSC threshold                                       |                             |                             |                         |                         |                     |
| Map sharpening <i>B</i> factor (Å <sup>2</sup> )    | -85.5                       | -127.5                      | -72.8                   | -78.6                   | -95.4               |
| <b>Model composition</b>                            |                             |                             |                         |                         |                     |
| Non-hydrogen atoms                                  | 23,180                      | 6040                        | 20,338                  | 22,083                  | 20,790              |
| Protein residues                                    | 2,700                       | 377                         | 2,502                   | 2,516                   | 2550                |
| Ligand atoms                                        | 2,412                       | 40                          | 192                     | 1871                    | 344                 |
| <b>R.m.s. deviations</b>                            |                             |                             |                         |                         |                     |
| Bond lengths (Å)                                    | 0.006                       | 0.006                       | 0.006                   | 0.007                   | 0.006               |
| Bond angles (°)                                     | 1.158                       | 1.203                       | 1.236                   | 1.433                   | 1.207               |
| <b>Validation</b>                                   |                             |                             |                         |                         |                     |
| CC (across whole map volume)                        | 0.4893                      | 0.3813                      | 0.5624                  | 0.4967                  | 0.6085              |
| CC (only across atoms in the model)                 | 0.6731                      | 0.6633                      | 0.7449                  | 0.7067                  | 0.7786              |
| Clashscore, all atoms                               | 3.84                        | 4.47                        | 5.97                    | 3.26                    | 4.73                |
| Poor rotamers (%)                                   | 0.00                        | 0.31                        | 0.45                    | 0.18                    | 0.71                |
| <b>Ramachandran plot</b>                            |                             |                             |                         |                         |                     |
| Favored (%)                                         | 87.93                       | 81.40                       | 87.15                   | 87.2                    | 11.64               |
| Allowed (%)                                         | 11.45                       | 17.25                       | 12.21                   | 12.4                    | 11.64               |
| Disallowed (%)                                      | 0.62                        | 1.31                        | 0.64                    | 0.32                    | 0.63                |

## Supplementary References

- 1 Deng, Z. *et al.* Gating of human TRPV3 in a lipid bilayer. *Nature Structural & Molecular Biology* **27**, 635-644, doi:10.1038/s41594-020-0428-2 (2020).
- 2 Deng, Z. *et al.* Cryo-EM and X-ray structures of TRPV4 reveal insight into ion permeation and gating mechanisms. *Nature Structural & Molecular Biology* **25**, 252-260, doi:10.1038/s41594-018-0037-5 (2018).
